# Supplementary material for: Breast cancer patient-derived explant cultures recapitulate in vivo drug responses
Source: PubMed Central journal article supplement (PMC9992973; doi:10.3389/fonc.2023.1040665), 2023-02-22
Supplement: DataSheet_1.pdf [file DataSheet_1.pdf]

**Supplementary Table S1. Organoid Medium (OM and OM+\*) composition.**

| <b>OM components</b>    | <b>Supplier</b> | <b>Catalogue #</b> | <b>Final concentration</b> |
|-------------------------|-----------------|--------------------|----------------------------|
| Advanced DMEM/F12       | Gibco           | 12634010           | 1x                         |
| Penicillin/Streptomycin | Gibco           | 15140-122          | 100 U/ml                   |
| GlutaMax 100x           | Gibco           | 35050061           | 1x                         |
| Hepes                   | Gibco           | 15630056           | 10 mM                      |
| R-Spondin 3             | Peprotech       | 120-44             | 250 ng/ml                  |
| Neuregulin 1            | Peprotech       | 100-03             | 5 nM                       |
| FGF 7                   | Peprotech       | 100-19             | 5 ng/ml                    |
| FGF 10                  | Peprotech       | 100-26             | 20 ng/ml                   |
| EGF                     | Peprotech       | AF-100-15          | 5 ng/ml                    |
| Noggin                  | Peprotech       | 120-10C            | 100 ng/ml                  |
| A83-01                  | Tocris          | 2939               | 500 nM                     |
| Y-27632                 | Abmole          | Y-27632            | 10 $\mu$ M                 |
| SB202190                | Sigma           | S7067              | 500 nM                     |
| B27 supplement          | Gibco           | 17504-44           | 1x                         |
| N-Acetylcysteine        | Sigma           | A9165-5g           | 1.25 mM                    |
| Nicotinamide            | Sigma           | N0636              | 5 mM                       |

\*OM+, as OM with added 5  $\mu$ M Nutlin-3 (Cayman, Cat. # 10004372).

**Supplementary Table S2. Antibodies/dyes used for immunofluorescent staining.**

| <b>Primary antibodies/dyes</b> | <b>Supplier</b>        | <b>Catalogue #</b> | <b>Dilution</b> |
|--------------------------------|------------------------|--------------------|-----------------|
| human EpCAM                    | BioLegend              | 324202             | 100             |
| human CK14                     | Novocastra             | NCL-L-LL002        | 100             |
| human CK19                     | Novus Bio              | NBP1-78278         | 100             |
| human Mitochondria             | AbCam                  | ab92824            | 800             |
| human PanCK                    | AbCam                  | ab86734            | 100             |
| mouse H-2Kd/Dd                 | Invitrogen             | MA5-18004          | 600             |
| Alexa 546 Phalloidin (F-actin) | Molecular Probes       | A22283             | 50              |
| DAPI                           | Sigma-Aldrich          | D9542              | 1 $\mu$ g/ml    |
| <b>Secondary antibodies</b>    |                        |                    |                 |
| goat anti-mouse Alexa 488      | Invitrogen             | 21141              | 800             |
| donkey anti-mouse Alexa 488    | Jackson ImmunoResearch | 715-545-150        | 400             |
| donkey anti-rabbit Alexa 555   | Invitrogen             | A32794             | 200             |
| goat anti-mouse Alexa 568      | Invitrogen             | A21043             | 800             |

## Supplementary Figure S1

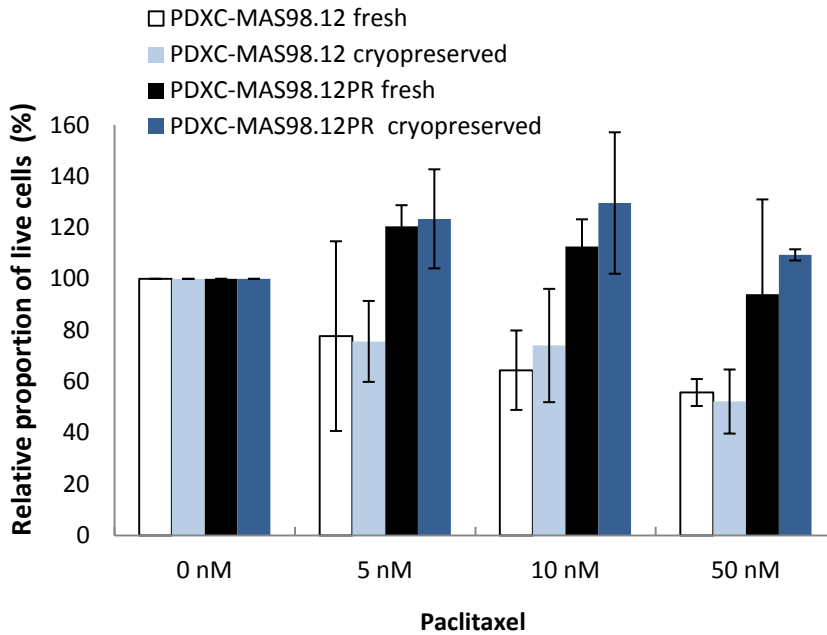

**Supplementary Figure S1. Response to paclitaxel in PDXCs from fresh *versus* cryopreserved MAS98.12 and MAS98.12PR PDXs tissue.** PDXCs in Matrigel prepared from either fresh or cryopreserved tumor tissue were treated with paclitaxel for one week before staining with calcein/PI to quantify a proportion of viable cells in each condition. The data are presented as a percentage of the respective untreated controls; average  $\pm$  StDv (n=2). The merged data (from fresh and cryopreserved tissue) are shown in Figure 5.

## Supplementary Figure S2

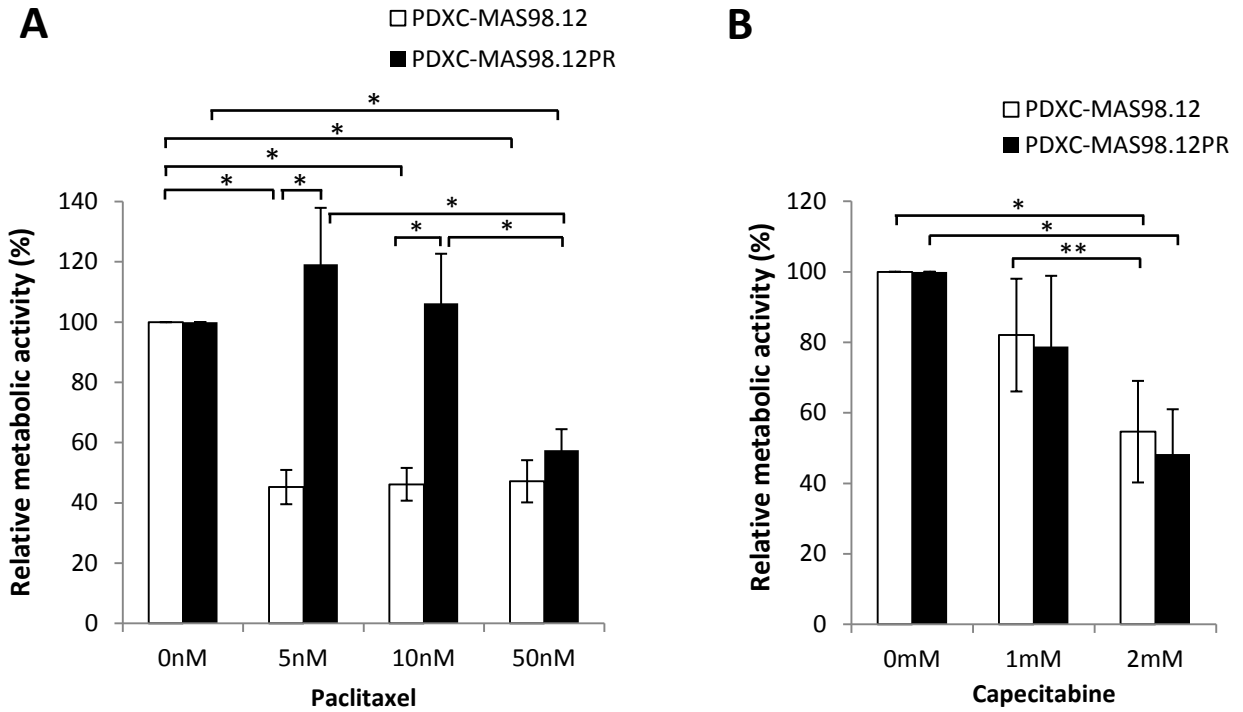

**Supplementary Figure S2. MAS98.12/MAS98.12PR-derived PDXCs response to paclitaxel and capecitabine as scored by measuring metabolic activity.** The PDXCs in Matrigel were treated with the indicated concentrations of paclitaxel (A) or capecitabine (B) for one week before measurement of the treatment effect by the CTG assay; the values in treated cultures are presented as a percentage of the respective untreated controls; average  $\pm$  SEM (n=3); \* and \*\*,  $p < 0.05$  by unpaired and paired t-test, respectively.

# Supplementary Figure S3

**A**

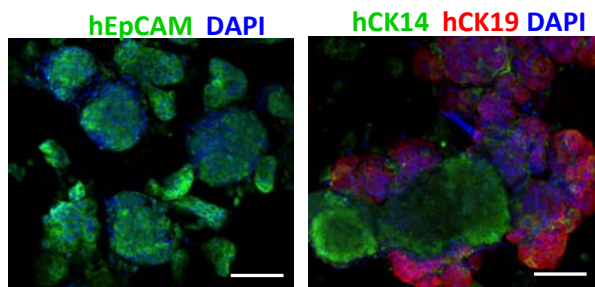

**B**

A)

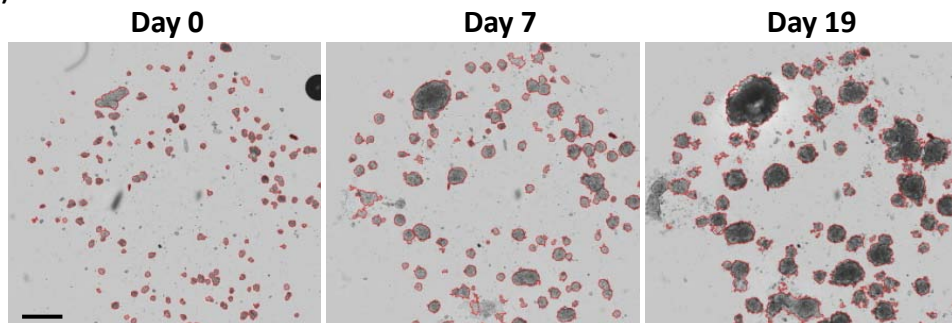

B)

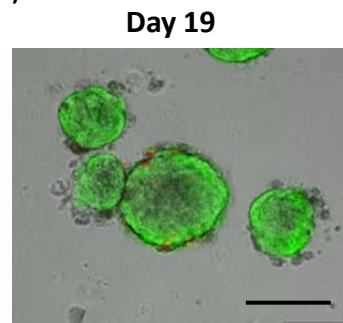

**C**

A)

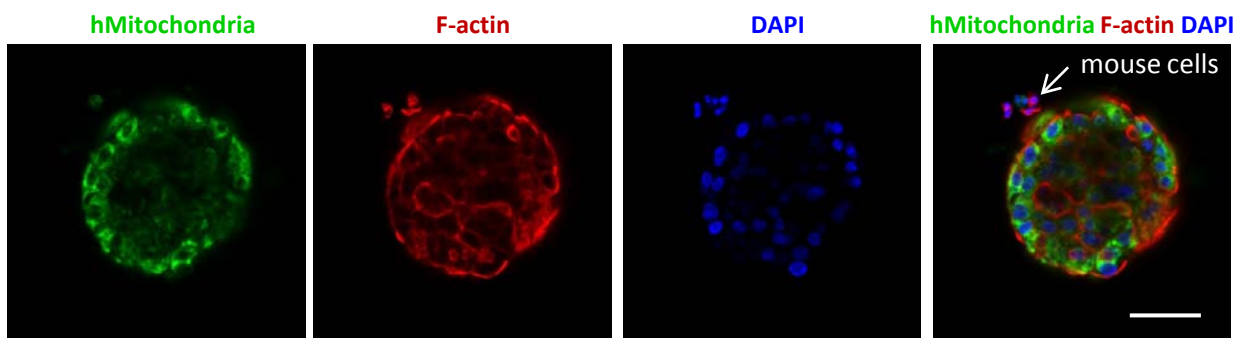

B)

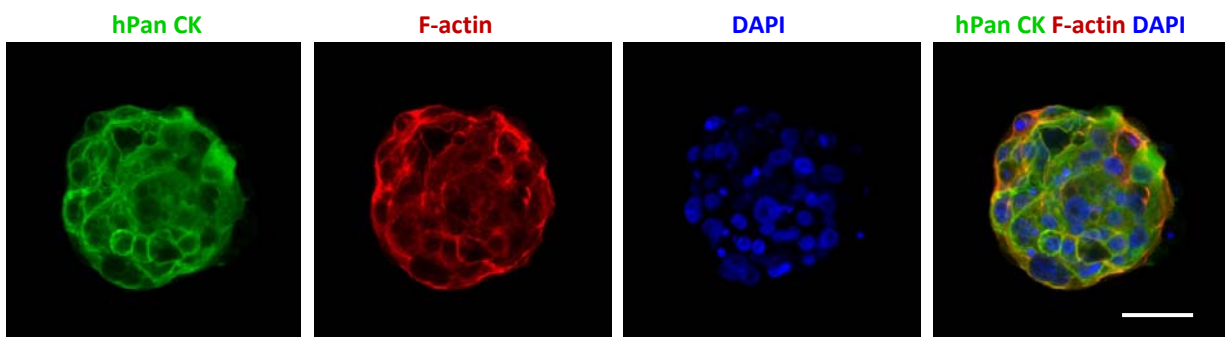

c)

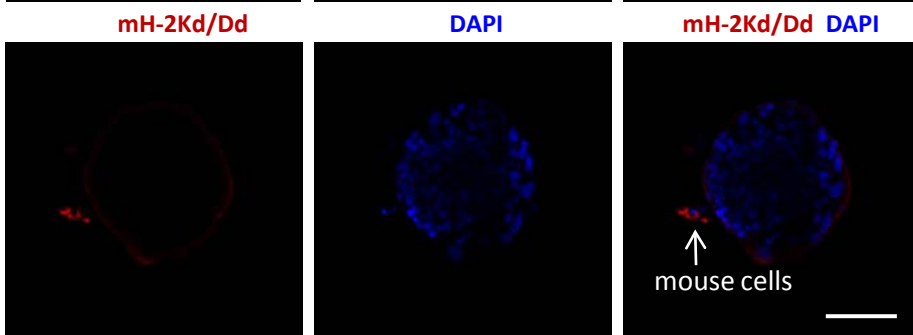

**Supplementary Figure S3. Characterization of HBCx39-derived PDXCs.** (A) IF staining of the dissociated HBCx39 PDX tissue suspension with human EpCAM, CK14 and CK19 (DAPI stains the nucleus); scale bars, 100  $\mu\text{m}$ . (B) Growth of fragments isolated from HBCx39 and embedded in Matrigel; phase contrast pictures taken over time (A; scale bar 500  $\mu\text{m}$ ) and calcein/PI staining pictures of 19d-cultures (B; scale bar 200  $\mu\text{m}$ ). (C) IF staining of the 19 d-cultures stained with human mitochondria (A), human panCK (B) and mouse H-2Kd/Dd (C) (cytoskeleton (F-actin) and nucleus (DAPI) stainings are shown); single mouse cells found in the cultures are indicated by arrows; scale bars, 100  $\mu\text{m}$ .

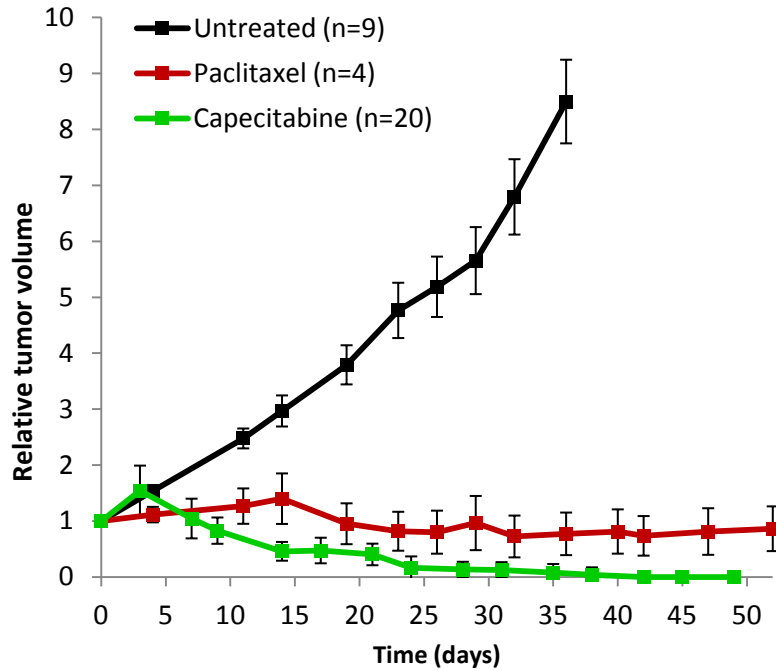

**Supplementary Figure S4. Response of HBCx39 PDX to paclitaxel and capecitabine; prolonged follow-up of the treated tumors from Figure 7.** The treatment was performed as specified in Fig. 7 (i.e. paclitaxel (15 mg/kg, 2x/week) and capecitabine (755 mg/kg, 5x/week)). Relative volume of the treated tumors that were followed for 7 weeks is shown (average  $\pm$  SEM, n indicated in the legend).

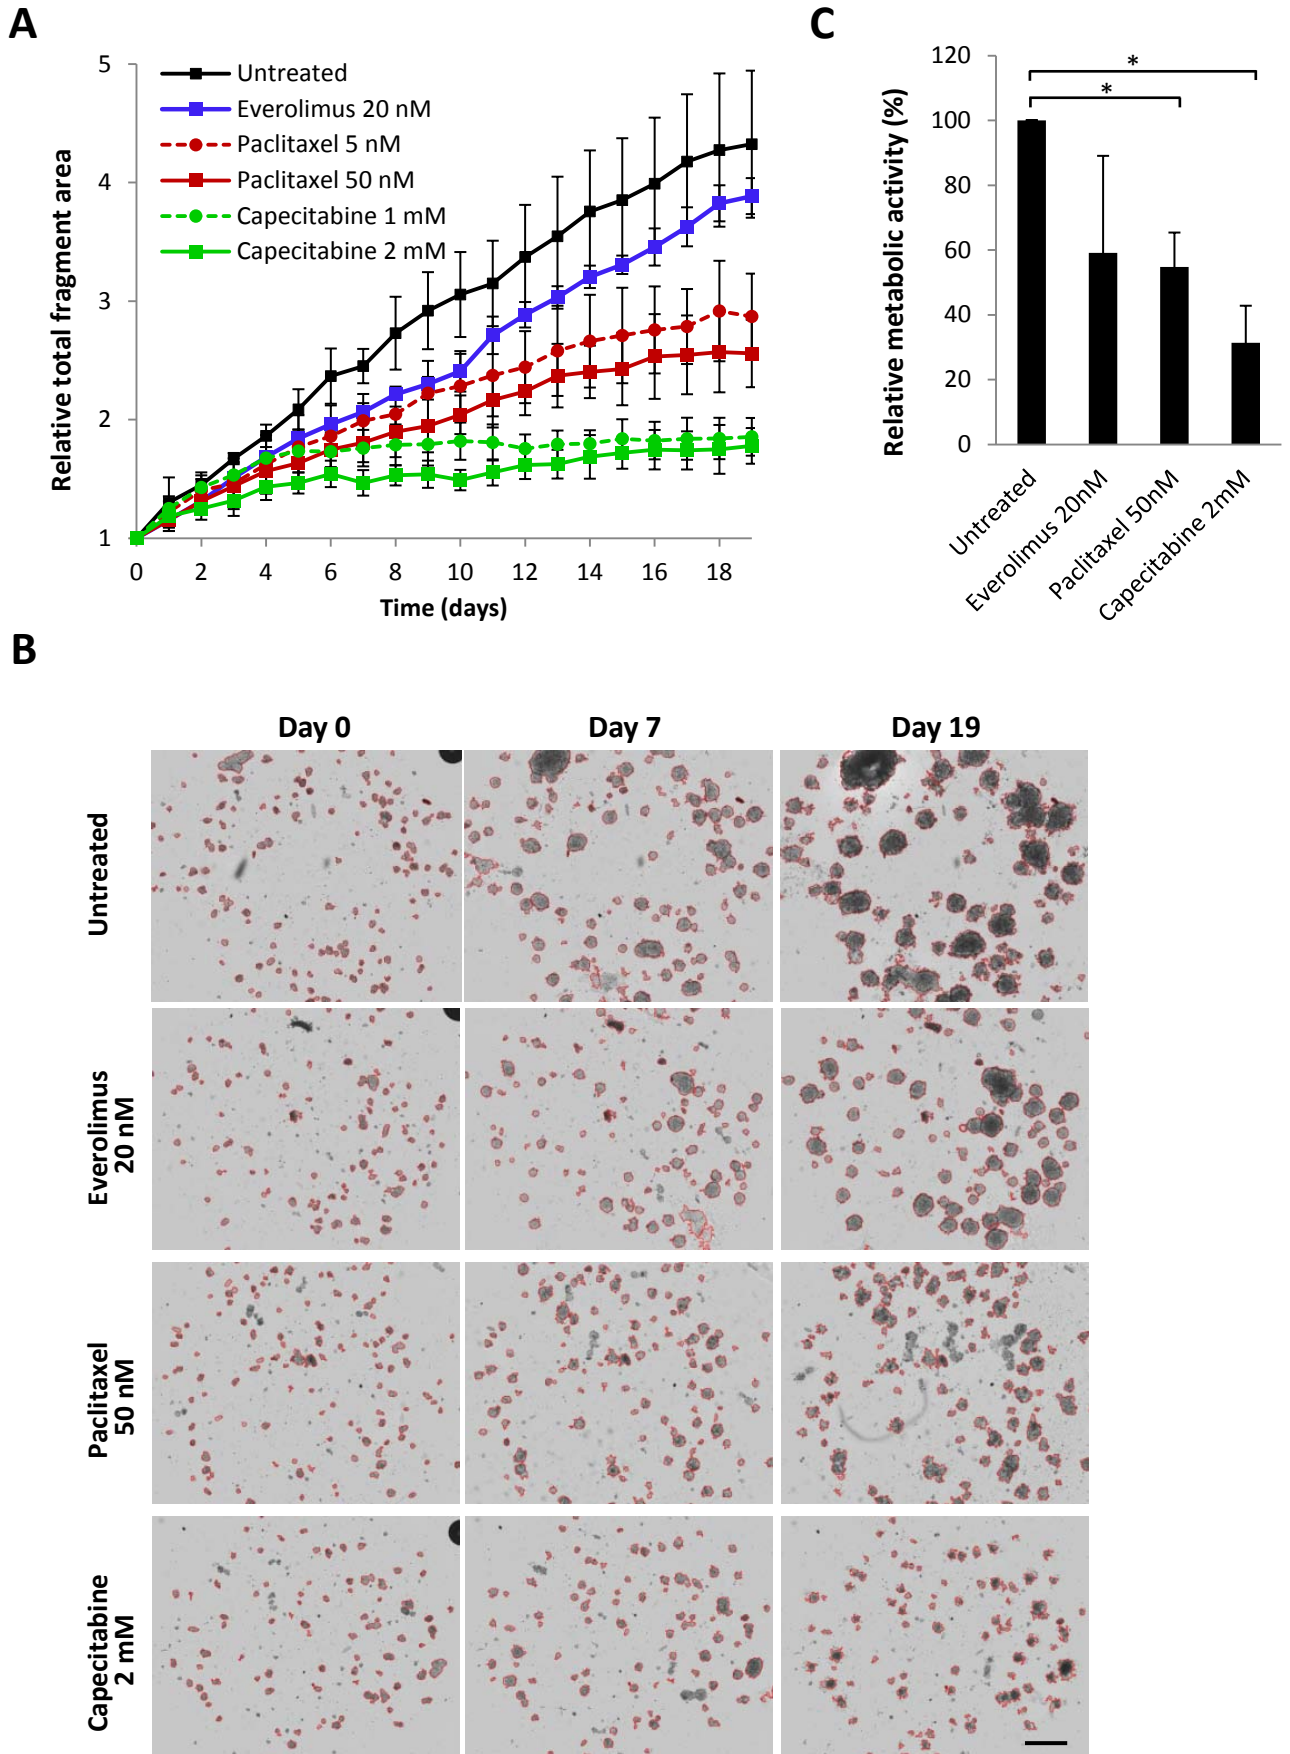

**Supplementary Figure S5. Response of HBCx39-derived PDXCs to paclitaxel, capecitabine and everolimus.** A) Relative fragment area normalized to the area at the start of the treatment; average  $\pm$  StDv ( $n \geq 10$  in one representative experiment); extended Fig. 7C, showing the effect of additional doses of paclitaxel (5 nM) and capecitabine (1 mM). B) Phase contrast pictures of the treated and control PDXCs over time. Red lines indicate the fragment borders detected by the Incucyte S3 organoid analysis software module and used to calculate the total fragment area; scale bar 500  $\mu$ m. C) Response to the indicated drugs as measured by the CTG assay detecting the metabolic activity; the values in treated PDXCs are presented in percentage of the respective untreated controls; average  $\pm$  SEM ( $n=3$  for paclitaxel and capecitabine) and  $\pm$  StDv ( $n=2$  for everolimus); \*,  $p < 0.05$  by unpaired t-test.
